# Supplementary material
Source: PubMed Central journal article supplement (PMC6551770)
Supplement: ASN.2018090909SupplementaryData.pdf [file ASN.2018090909SupplementaryData.pdf]

## Supplemental Data Table of Contents

| Data Title                                             | Data Description                                                                                      | Data available in File                |
|--------------------------------------------------------|-------------------------------------------------------------------------------------------------------|---------------------------------------|
| Method S1: IGM Bioinformatics Processing               | IGM Bioinformatics Processing                                                                         | CKD collapsing JASN SuppMat_Final.pdf |
| Method S2: Quality Metrics                             | Quality Metrics used in Collapsing Analyses                                                           | As above                              |
| Method S3: Missense intolerance scores                 | Missense intolerance scores description                                                               | As above                              |
| Method S3: UK biobank Lookup                           | Top genes from the collapsing analysis and CKD phenotypes in a UK biobank analysis                    | As above                              |
| Figure S1: <i>APOL1</i> PCA plots                      | PCA plots of the <i>APOL1</i> cases and population-matched controls                                   | As above                              |
| Figure S2: QQ plots of synonymous variants             | QQ plots of synonymous variants (experimental negative control) in each sub-group                     | As above                              |
| Figure S3: <i>CPT2</i> enrichment, MTR filter          | Lollipop plots and bar chart of <i>CPT2</i> enrichment using the MTR $\leq$ 50% filter                | As above                              |
| Figure S4: Power curve                                 | Power curve for different control carrier frequencies                                                 | As above                              |
| Table S1: Cohort Demographics                          | Cohort Demographics                                                                                   | As above                              |
| Table S2: Control cohort phenotypes                    | Control cohort phenotypes                                                                             | As above                              |
| Table S3: Qualifying Variant parameters and subgroups  | Qualifying Variant parameters and subgroups                                                           | As above                              |
| Table S4: LIMBR and MTR comparison                     | LIMBR and MTR comparison to standard missense-only collapsing analysis run                            | As above                              |
| Table S5: All genes across all models where $P < 0.05$ | All genes across all models where $P < 0.05$                                                          | SUPP_TABLE_S5_Final.xlsx              |
| Column descriptors for Table S5                        | Column descriptors for Table S5                                                                       | CKD collapsing AJHG SuppMat_Final.pdf |
| Table S6: Clinical phenotypes in known genes           | Distribution of phenotypes in cases with qualifying variants in PKD1, PKD2, COL4A3, COL4A4 and COL4A5 | As above                              |

|                                                      |                                                                                                   |          |
|------------------------------------------------------|---------------------------------------------------------------------------------------------------|----------|
| Table S7: Ancestry prediction in modifier analysis   | Ancestry predictions of cases in modifier analysis groups                                         | As above |
| Table S8: <i>AHDC1</i> rare QV rates in <i>APOL1</i> | <i>AHDC1</i> rare QV rates in cases with <i>APOL1</i> genotypes against ancestry-matched controls | As above |
| Table S9: Look-up of UK biobank data                 | Look up of top genes in a recent analysis of UK biobank data                                      | As above |
| Table S10: Predicting p-value signals                | Predicting possible p-value signals among an increasing sized test cohort                         | As above |

### **1. Supplemental Method: IGM Bioinformatics Processing**

Samples were evaluated first across 12,840 single nucleotide polymorphisms (SNPs). These SNPs were previously shown in-house to be informative across diverse human populations, and reliable for genotyping exome sequence, and so were ideal for identifying cryptic relationships and population stratification. The exomes of a full cohort of 3,169 CKD patients and 9,996 controls were assessed for cryptic relatedness using KING[1]. Where pairs of samples were estimated as second-degree relatives or nearer, one of the pair was removed, favouring the inclusion of cases over controls. All samples were then compared across 10 principal components (PCs) using EIGENSTRAT[2] and outliers ( $\pm 6$  standard deviations across any PC) were excluded. Following these QC steps a total of 3,150 cases and 9,563 controls remained.

### **2. Supplemental Method: Quality Metrics used in Collapsing Analyses**

In addition to the criteria described in the Methods section, we required variants to have: i) at least 10-fold coverage, ii) quality score (QUAL) of at least 50, iii) genotype quality score (GQ) of at least 20, iv) quality by depth score (QD) of at least 2, v) mapping quality score (MQ) of at least 40, vi) read position rank sum score (RPRS) greater than -4, vii) mapping quality rank sum score (MQRS) greater than -10, viii) Fisher's strand bias score (FS) less than 200 (indels) or less than 60 (SNVs), ix) for heterozygous genotypes, the alternate allele fraction was required to be at least 0.25. We also excluded variants if they were among a predefined list of known sequencing artefacts (a list of previously established in-house of variants showing a significant frequency imbalance between European controls in our sequencing database and European samples in EVS despite good coverage) or if they were marked as being problematic variants by EVS as failed with their SVM classification (<http://evs.gs.washington.edu/EVS/HelpDescriptions.jsp>) or ExAC[3] (using VQSLOD filter).

### **3. Supplemental Method: Missense intolerance scores**

We adopt two novel approaches to identifying missense intolerant regions within genes. The sliding-window Missense Tolerance Ratio (MTR) quantifies missense variant intolerance within a gene independent of known functional boundaries.[4] This metric quantifies how missense depleted a 31-codon window of a gene is based on the gnomAD exome standing variation data. Comparing ClinVar pathogenic variants to novel control missense variants shows striking enrichment for pathogenic variants occurring in the missense intolerant sub-regions of protein-coding genes (<http://mtr-viewer.mdhs.unimelb.edu.au/>). The localized intolerance model using Bayesian regression (LIMBR), extends the work in our earlier subRVIS regional collapsing[5] by fitting a Bayesian multi-level model to gene exons according to the Conserved Domain Database[6, 7], regressing the number of missense variants on the total number of variants to leverage information about how missense variants within the same gene or gene sub-region may be related to each other.

To perform regional missense-intolerance informed collapsing analyses, similar to the use of the PolyPhen-2 score[8], we included missense-specific filters to further require that a missense variant also occur in an missense intolerant region based on either the MTR or LIMBR. For MTR we required missense variants occur among the 50<sup>th</sup> percentile most missense intolerant sliding windows specific to that gene. It considers case/control missense variants occurring in the tolerant 50% of protein-coding sliding windows of a gene as no longer qualifying. For LIMBR, we selected a filtering threshold of the 50<sup>th</sup> percentile for our collapsing analysis. Missense variants in exons with LIMBR percentiles greater than 50 were excluded from analysis [9].

### **4. Supplementary methods. UK biobank Lookup**

We selected all kidney associated traits from the UK Biobank (cite Canela-Xandri et al., Nature genetics 2018) data and downloaded their GWAS p-values for genotyped and imputed variants from GeneAtlas (<http://geneatlas.roslin.ed.ac.uk/>, last accessed 2018-12-01). Quality control for imputed variants included ensuring an imputation score  $\geq 0.9$ , a MAF of  $\geq 0.001$ , and a Hardy Weinberg Equilibrium p-value of  $\geq 10^{-10}$ . All variants with a p-value of  $< 10^{-4}$  for any of the kidney traits were included as variants with suggestive GWAS signal for kidney disorders. Finally, we mapped the variants to genes by including 50 kb up- and downstream of the gene. The final list consisted of 7,542 out of 18,852 genes.

#### List of kidney related traits in UK Biobank

| key                      | Description                                                                                        |
|--------------------------|----------------------------------------------------------------------------------------------------|
| clinical_c_Block_N00-N08 | N00-N08 Glomerular diseases                                                                        |
| clinical_c_Block_N10-N16 | N10-N16 Renal tubulo-interstitial diseases                                                         |
| clinical_c_Block_N17-N19 | N17-N19 Renal failure                                                                              |
| clinical_c_Block_N20-N23 | N20-N23 Urolithiasis                                                                               |
| clinical_c_Block_N25-N29 | N25-N29 Other disorders of kidney and ureter                                                       |
| clinical_c_Block_O10-O16 | O10-O16 Oedema, proteinuria and hypertensive disorders in pregnancy, childbirth and the puerperium |
| clinical_c_I12           | I12 Hypertensive renal disease                                                                     |
| clinical_c_N03           | N03 Chronic nephritic syndrome                                                                     |
| clinical_c_N12           | N12 Tubulo-interstitial nephritis, not specified as acute or chronic                               |
| clinical_c_N13           | N13 Obstructive and reflux uropathy                                                                |
| clinical_c_N17           | N17 Acute renal failure                                                                            |
| clinical_c_N18           | N18 Chronic renal failure                                                                          |
| clinical_c_N19           | N19 Unspecified renal failure                                                                      |
| clinical_c_N20           | N20 Calculus of kidney and ureter                                                                  |
| clinical_c_N23           | N23 Unspecified renal colic                                                                        |
| clinical_c_N28           | N28 Other disorders of kidney and ureter, not elsewhere classified                                 |
| selfReported_n_1213      | renal/kidney failure                                                                               |
| selfReported_n_1217      | urinary tract infection/kidney infection                                                           |
| selfReported_n_1218      | kidney stone/ureter stone/bladder stone                                                            |
| selfReported_n_1454      | other renal/kidney problem                                                                         |

## Figure S1 Ancestry Matching for *APOL1* analysis

**Filters for calling *APOL1* G1 / G2 variants:** Min base coverage: 3. Min QUAL (GATK): 30. Var-status (GATK): pass or intermediate

### Control and non-dual-risk cases selection

Figure S1A: PCA plot for *APOL1* dual-risk cases (cases are homozygous or compound het for G1/2 alleles)

Figure S1B: PCA plot for no *APOL1* dual risk cases (cases are heterozygous G1/2 or homozygous reference for both).

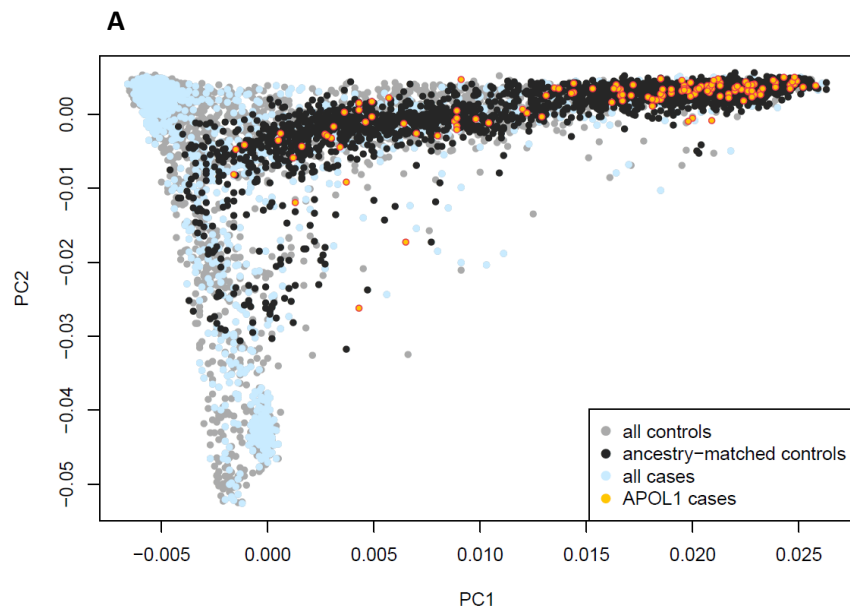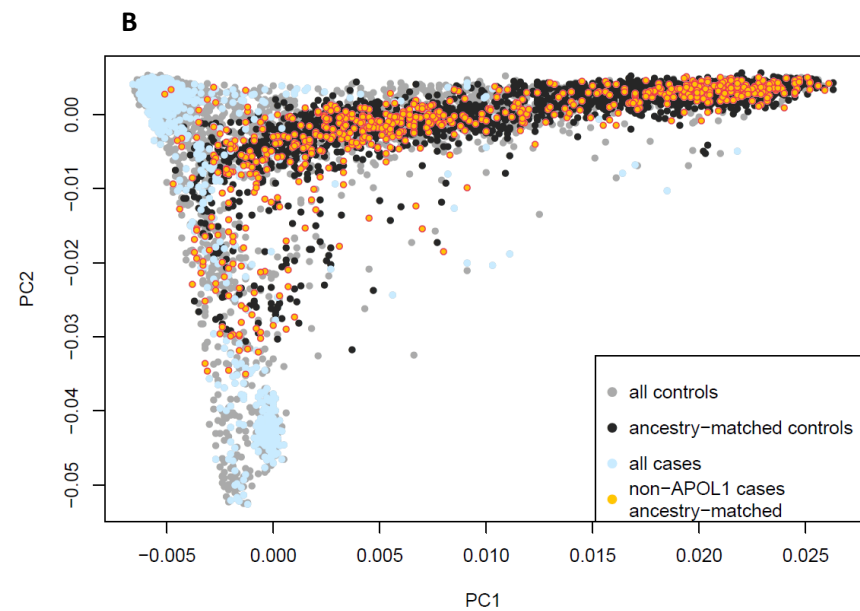

Figure S2. Quantile-Quantile plots for the dominant synonymous models of each subgroup. (continued on next page)

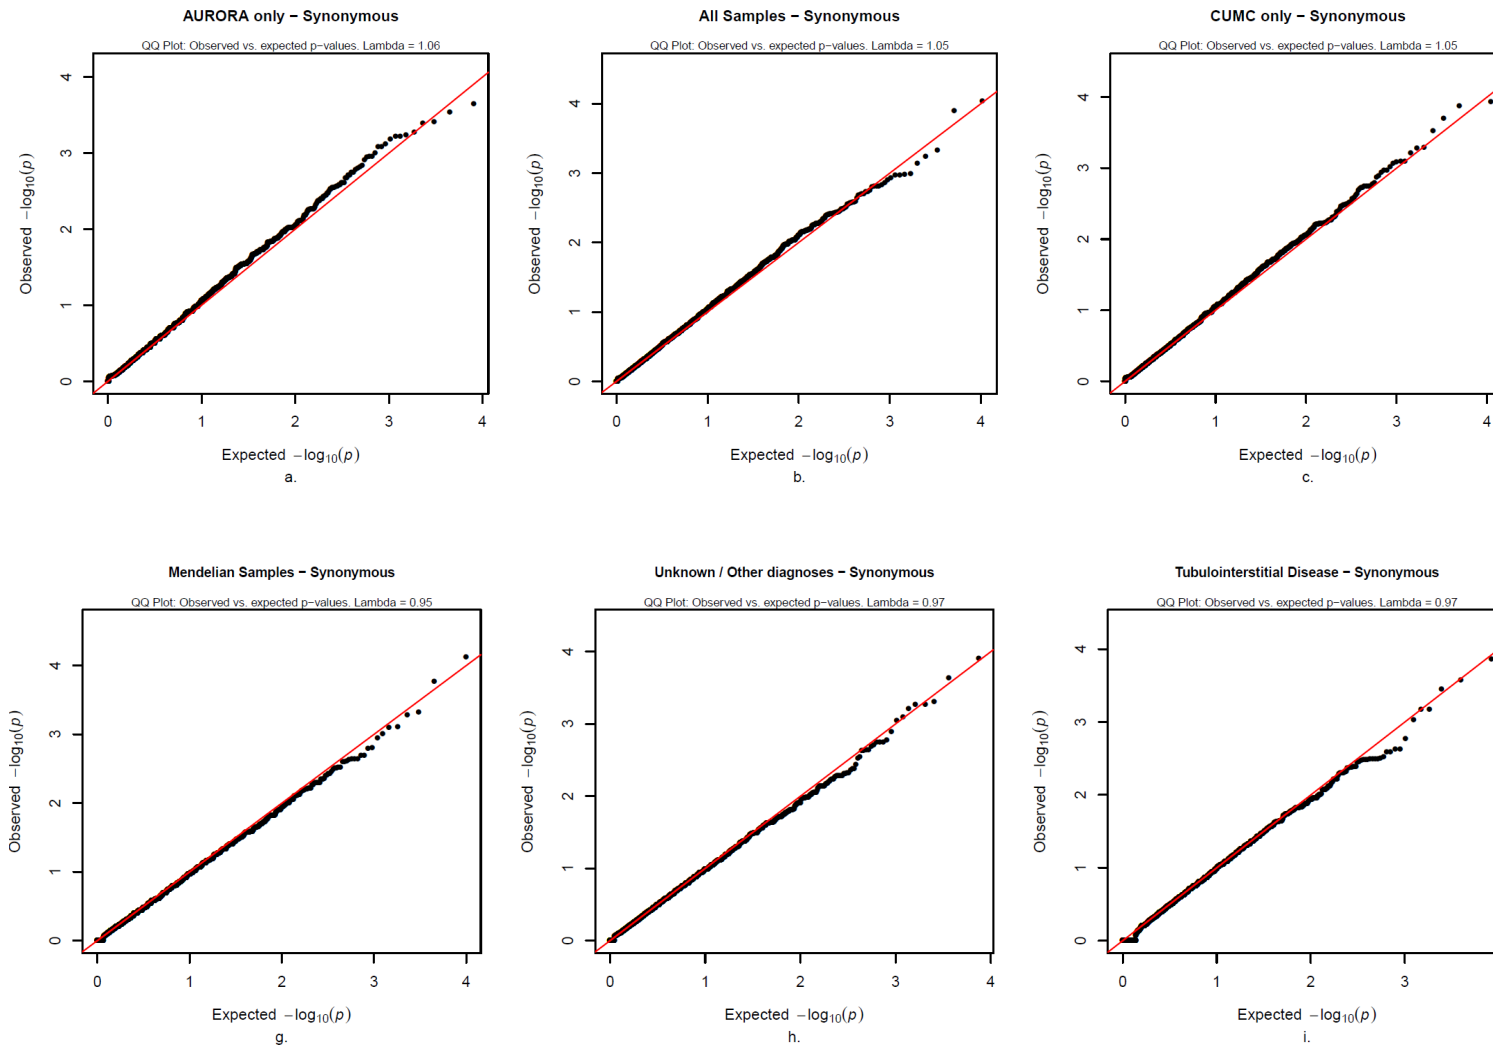

Diabetic Nephropathy – Synonymous

QQ Plot: Observed vs. expected p-values. Lambda = 1.1

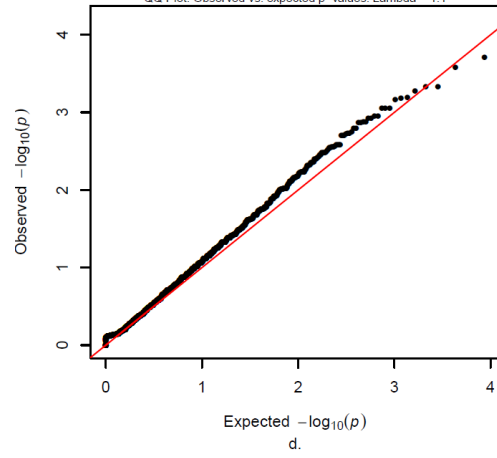

Glomerulopathy – Synonymous

QQ Plot: Observed vs. expected p-values. Lambda = 1.04

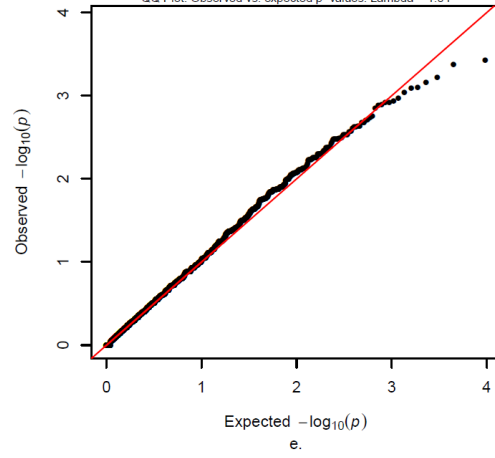

Hypertensive Nephropathy – Synonymous

QQ Plot: Observed vs. expected p-values. Lambda = 1

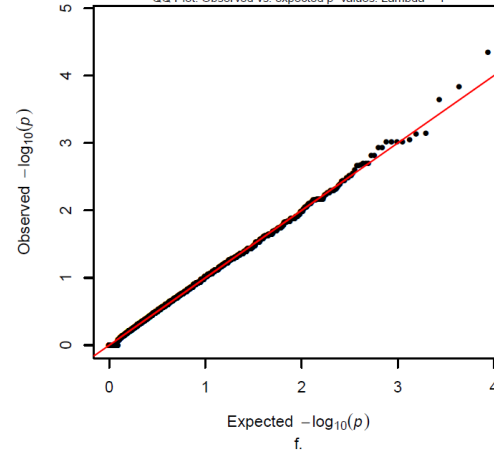

Supplemental Figure S3: Lollipop diagram of rare missense variants in *CPT2*, across case and control collections, with no intolerance filter (A) and after qualifying the MTR  $\leq 50^{\text{th}}$  percentile threshold (B). Case variant distribution is plotted in red and control is plotted in blue. The proportion of control and case variants across different categories of rare missense variants is shown in (C) and highlights the signal detection improvement driven by adopting the MTR  $\leq 50^{\text{th}}$  percentile threshold ( $p = 7.45 \times 10^{-8}$ , 95% CI lower = 0.44, 95% CI higher = 0.74, exact binomial test where observed proportion of case variants in MTR  $\leq 50^{\text{th}}$  % = 0.60, expected proportion from MTR  $> 50^{\text{th}}$  % = 0.23).

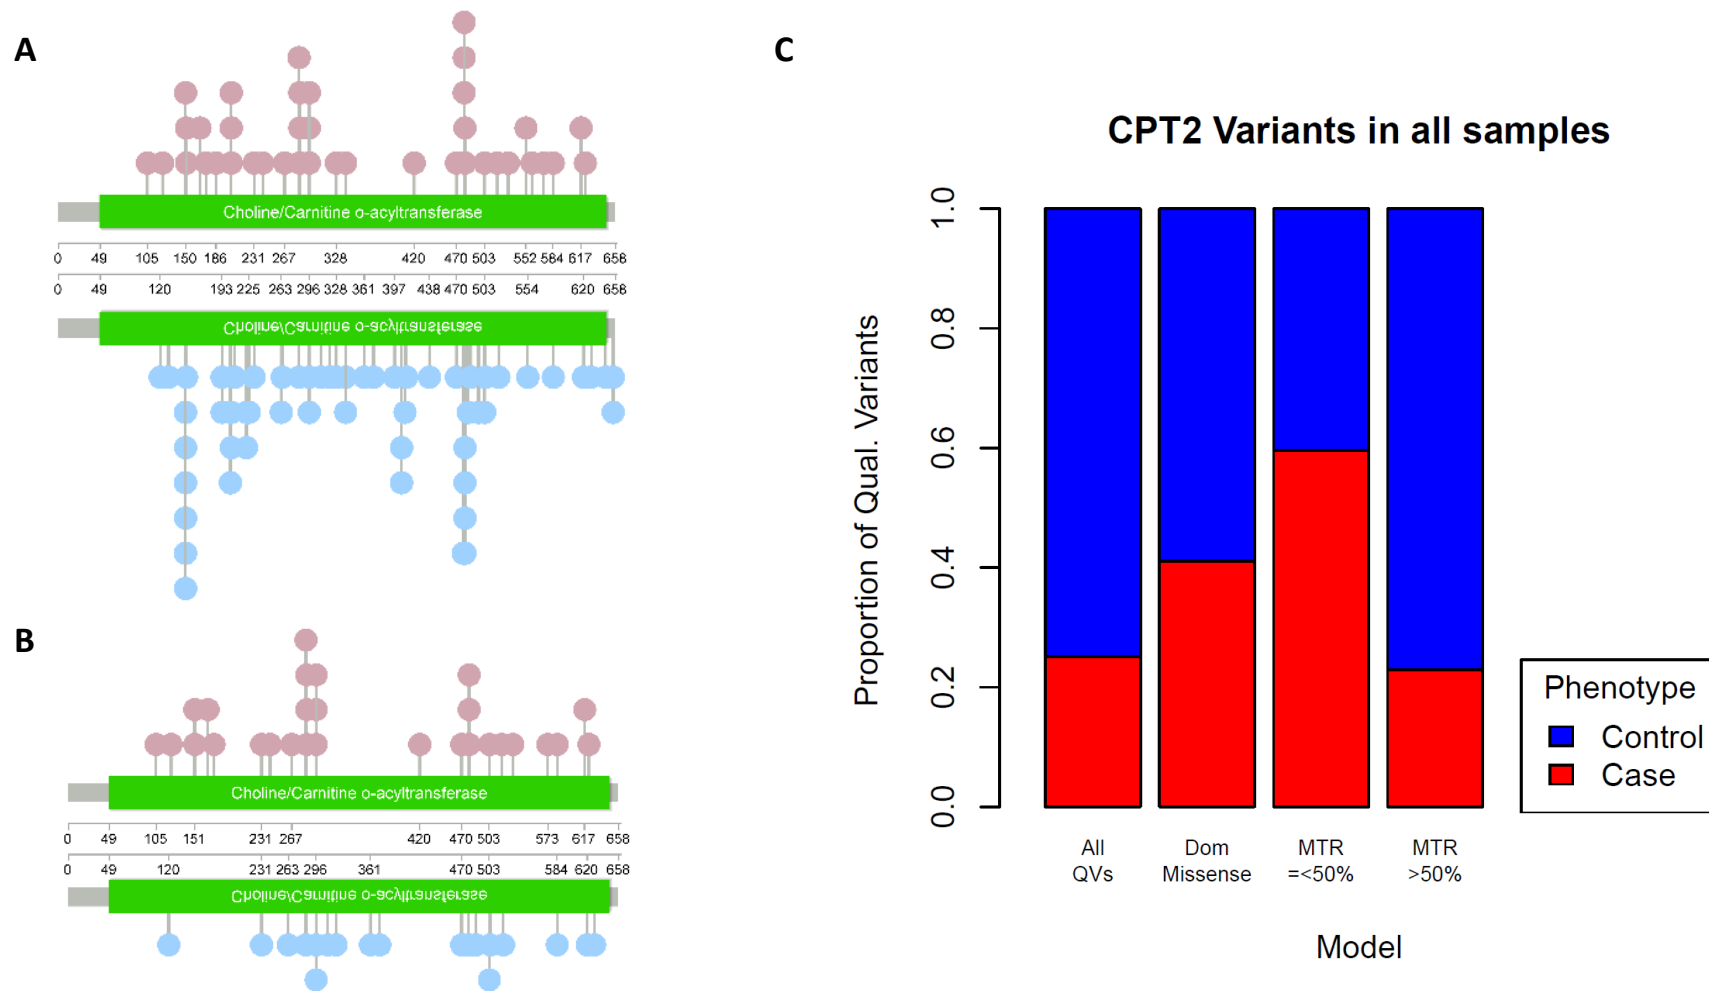



**Supplemental Figure S4: Power curve for different control carrier frequencies.**

Illustrating the number of cases required to achieve study-wide significance under a two-sided Fisher's exact test ( $\alpha = 2.7 \times 10^{-8}$ ), with 80% power and assuming a constant cohort growth at the current 25%:75% (case:control) ratio. The estimated number of cases required to reach the study-wide significance threshold is represented along the y-axis. The different control carrier frequency scenarios are illustrated by coloured curves.

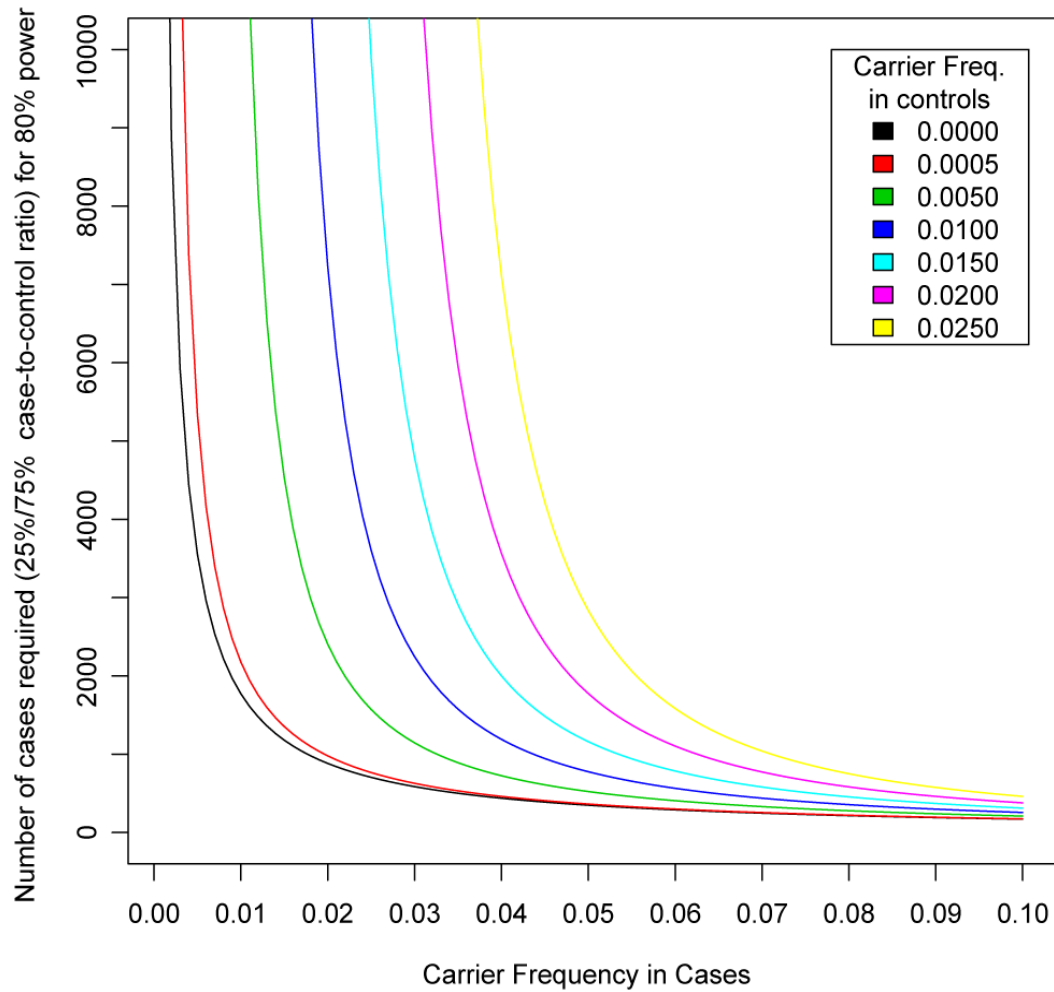

**Table S1: Cohort Demographics**

|                                    | AURORA     |         | CUMC      |         | Control |         | Total  |         |
|------------------------------------|------------|---------|-----------|---------|---------|---------|--------|---------|
|                                    | Number     | Percent | Number    | Percent | Number  | Percent | Number | Percent |
| <b>Gender</b>                      |            |         |           |         |         |         |        |         |
| Male                               | 685        | 61.8%   | 1160      | 56.8%   | 3881    | 40.6%   | 5726   | 45.0%   |
| Female                             | 424        | 38.2%   | 881       | 43.2%   | 5682    | 59.4%   | 6987   | 55.0%   |
| <b>Genotype predicted ancestry</b> |            |         |           |         |         |         |        |         |
| African                            | 15         | 1.4%    | 394       | 19.3%   | 1887    | 19.7%   | 2296   | 18.1%   |
| Caucasian                          | 981        | 88.5%   | 797       | 39.0%   | 4749    | 49.7%   | 6527   | 51.3%   |
| East Asian                         | 6          | 0.5%    | 120       | 5.9%    | 124     | 1.3%    | 250    | 2.0%    |
| Hispanic                           | 56         | 5.0%    | 365       | 17.9%   | 1536    | 16.1%   | 1957   | 15.4%   |
| Middle Eastern                     | 2          | 0.2%    | 40        | 2.0%    | 179     | 1.9%    | 221    | 1.7%    |
| South Asian                        | 4          | 0.4%    | 17        | 0.8%    | 21      | 0.2%    | 42     | 0.3%    |
| Unknown                            | 45         | 4.1%    | 308       | 15.1%   | 1067    | 11.2%   | 1420   | 11.2%   |
| <b>Age</b>                         |            |         |           |         |         |         |        |         |
| Mean (SD)                          | 64.4 (8.6) |         | 44.6 (20) |         | NA      |         | NA     |         |

Genetic ancestry for CKD samples was estimated by using PCA results, as previously described.[10]

**Table S2: Control cohort phenotypes**

| Broad diagnosis                    | Controls    |               |
|------------------------------------|-------------|---------------|
|                                    | Number      | Percent       |
| Healthy (no disease ascertainment) | 6437        | 67.3%         |
| Dementia                           | 710         | 7.4%          |
| Common Epilepsies*                 | 2377        | 24.9%         |
| Other Neurological                 | 39          | 0.4%          |
| <b>Total</b>                       | <b>9563</b> | <b>100.0%</b> |

\*No paediatric epilepsies included.

**Table S3: Qualifying Variant parameters and subgroups. The internal cohort is the cohort being studied (AURORA, CUMC and controls).**

|                                       | Function                        | External MAF (gnomAD*) | MAF (internal cohort) | Polyphen-2 (HumVar) Filter          | Tolerance filter | Tested Groups                                         |
|---------------------------------------|---------------------------------|------------------------|-----------------------|-------------------------------------|------------------|-------------------------------------------------------|
| #Ultra-rare deleterious predicted (D) | PTV + missense + in-frame indel | 0                      | 0.05%                 | Probably                            | None             | 9 tests; Combined, CUMC, AURORA, 6 clinical subgroups |
| Ultra-rare non-benign (D)             | PTV + missense + in-frame indel | 0                      | 0.05%                 | Probably, Possibly, Unknown         | None             | 9 tests; Combined, CUMC, AURORA, 6 clinical subgroups |
| #Rare protein-truncating (D)          | PTV                             | 0.1%                   | 0.10%                 | NA                                  | None             | 9 tests; Combined, CUMC, AURORA, 6 clinical subgroups |
| #Rare non-benign (D)                  | PTV + missense + in-frame indel | 0.05%                  | 0.10%                 | Probably, Possibly, Unknown         | None             | 9 tests; Combined, CUMC, AURORA, 6 clinical subgroups |
| Rare missense only (D)                | Missense                        | 0.05%                  | 0.10%                 | Probably, Possibly, Unknown, Benign | None             | 9 tests; Combined, CUMC, AURORA, 6 clinical subgroups |
| #Rec non-syn (R)                      | PTV + missense + in-frame indel | 1.00%                  | 1.00%                 | Probably, Possibly, Unknown, Benign | None             | 1 test; Combined (n=1,778 European ancestry cases)    |
| Ultra-rare non-benign MTR50 (D)       | PTV + missense + in-frame indel | 0                      | 0.05%                 | Probably, Possibly, Unknown         | MTR ≤50%         | 9 tests; Combined, CUMC, AURORA, 6 clinical subgroups |
| Ultra-rare non-benign LIMBR50 (D)     | PTV + missense + in-frame indel | 0                      | 0.05%                 | Probably, Possibly, Unknown         | LIMBR ≤50%       | 9 tests; Combined, CUMC, AURORA, 6 clinical subgroups |
| Rare non-benign MTR50 (D)             | PTV + missense + in-frame indel | 0.05%                  | 0.10%                 | Probably, Possibly, Unknown         | MTR ≤50%         | 9 tests; Combined, CUMC, AURORA, 6 clinical subgroups |
| Rare non-benign LIMBR50 (D)           | PTV + missense + in-frame indel | 0.05%                  | 0.10%                 | Probably, Possibly, Unknown         | LIMBR ≤50%       | 9 tests; Combined, CUMC, AURORA, 6 clinical subgroups |
| Rare missense only MTR50 (D)          | Missense                        | 0.05%                  | 0.10%                 | Probably, Possibly, Unknown, Benign | MTR ≤50%         | 9 tests; Combined, CUMC, AURORA, 6 clinical subgroups |
| Rare missense only LIMBR50 (D)        | Missense                        | 0.05%                  | 0.10%                 | Probably, Possibly, Unknown, Benign | LIMBR ≤50%       | 9 tests; Combined, CUMC, AURORA, 6 clinical subgroups |
| #Rare syn (D)                         | Synonymous                      | 0.05%                  | 0.10%                 | NA                                  | None             | 9 tests; Combined, CUMC, AURORA, 6 clinical subgroups |
| Rec syn (R)                           | Synonymous                      | 1.00%                  | 1.00%                 | NA                                  | None             | 1 test; Combined (n=1,778 European ancestry cases)    |

\*gnomAD max minor allele frequency (MAF) imposed across the six genetic ancestries African, American, Non-Finnish European, Finnish, East Asian, Ashkenazi Jewish and South Asian population MAFs. #These models are consistent with our previous collapsing analysis publications.[11, 12] PTV = Putative Protein Truncating Variant (incl. start lost, nonsense, frameshift, canonical splice), indel = insertion/deletion; Non-benign includes start lost, nonsense, frameshift, canonical splice, missense and inframe indels with the PolyPhen filter applying to missense variants, MTR = Missense Tolerance Ratio within gene percentile, LIMBR = localized intolerance model using Bayesian regression percentile. D = Dominant model, R/Rec = Recessive model (incl. homozygous, hemizygous and a compound heterozygous proxy whereby two qualifying variants identified in gene in absence of phase information).

**Table S4: LIMBR and MTR comparison to standard missense-only collapsing analysis run**

| Gene Name | Subgroup          | Model name                       | Exome-wide rank | Qualified case | Unqualified case | Qualified case freq. | Qualified ctrl | Unqualified ctrl | Qualified ctrl freq. | Enriched direction | Odds ratio | P        | CI 95 lower | CI 95 upper |
|-----------|-------------------|----------------------------------|-----------------|----------------|------------------|----------------------|----------------|------------------|----------------------|--------------------|------------|----------|-------------|-------------|
| COL4A3    | i-all_AURORA      | (Dominant) Rare Missense         | 316             | 35             | 1074             | 0.0316               | 193            | 9370             | 0.0202               | case               | 1.58       | 0.0204   | 1.10        | 2.28        |
| COL4A3    | i-all_AURORA      | (Dominant) Rare Missense LIMBR50 | 9598            | 0              | 1109             | 0                    | 5              | 9558             | 5.23E-04             | ctrl               | 0.00       | 1        | 0.00        | 14.78       |
| COL4A3    | i-all_AURORA      | (Dominant) Rare Missense MTR50   | 1242            | 18             | 1091             | 0.0162               | 101            | 9462             | 0.0106               | case               | 1.55       | 0.0956   | 0.93        | 2.56        |
| COL4A3    | v-AURORA-CUMC-all | (Dominant) Rare Missense         | 676             | 83             | 3067             | 0.0263               | 192            | 9371             | 0.0201               | case               | 1.32       | 0.0404   | 1.02        | 1.71        |
| COL4A3    | v-AURORA-CUMC-all | (Dominant) Rare Missense LIMBR50 | 15176           | 1              | 3149             | 3.18E-04             | 5              | 9558             | 5.23E-04             | ctrl               | 0.61       | 1        | 0.07        | 5.20        |
| COL4A3    | v-AURORA-CUMC-all | (Dominant) Rare Missense MTR50   | 3062            | 42             | 3108             | 0.0133               | 101            | 9462             | 0.0106               | case               | 1.27       | 0.2057   | 0.88        | 1.82        |
| COL4A3    | viii-CUMC-all     | (Dominant) Rare Missense         | 3067            | 50             | 1991             | 0.0245               | 192            | 9371             | 0.0201               | case               | 1.23       | 0.2012   | 0.89        | 1.68        |
| COL4A3    | viii-CUMC-all     | (Dominant) Rare Missense LIMBR50 | 10097           | 1              | 2040             | 4.90E-04             | 5              | 9558             | 5.23E-04             | ctrl               | 0.94       | 1        | 0.11        | 8.03        |
| COL4A3    | viii-CUMC-all     | (Dominant) Rare Missense MTR50   | 6954            | 25             | 2016             | 0.0122               | 101            | 9462             | 0.0106               | case               | 1.16       | 0.4815   | 0.75        | 1.80        |
| COL4A4    | i-all_AURORA      | (Dominant) Rare Missense         | 12825           | 21             | 1088             | 0.0189               | 175            | 9388             | 0.0183               | case               | 1.04       | 0.814    | 0.66        | 1.64        |
| COL4A4    | i-all_AURORA      | (Dominant) Rare Missense LIMBR50 | 14899           | 0              | 1109             | 0                    | 0              | 9563             | 0                    | NA                 | NA         | 1        | NA          | NA          |
| COL4A4    | i-all_AURORA      | (Dominant) Rare Missense MTR50   | 2524            | 6              | 1103             | 0.0054               | 94             | 9469             | 0.0098               | ctrl               | 0.55       | 0.1862   | 0.24        | 1.25        |
| COL4A4    | v-AURORA-CUMC-all | (Dominant) Rare Missense         | 14527           | 60             | 3090             | 0.019                | 179            | 9384             | 0.0187               | case               | 1.02       | 0.8801   | 0.76        | 1.37        |
| COL4A4    | v-AURORA-CUMC-all | (Dominant) Rare Missense LIMBR50 | 15175           | 0              | 3150             | 0                    | 0              | 9563             | 0                    | NA                 | NA         | 1        | NA          | NA          |
| COL4A4    | v-AURORA-CUMC-all | (Dominant) Rare Missense MTR50   | 6925            | 26             | 3124             | 0.0083               | 95             | 9468             | 0.0099               | ctrl               | 0.83       | 0.4592   | 0.54        | 1.28        |
| COL4A4    | viii-CUMC-all     | (Dominant) Rare Missense         | 13899           | 39             | 2002             | 0.0191               | 176            | 9387             | 0.0184               | case               | 1.04       | 0.8564   | 0.73        | 1.47        |
| COL4A4    | viii-CUMC-all     | (Dominant) Rare Missense LIMBR50 | 15067           | 0              | 2041             | 0                    | 0              | 9563             | 0                    | NA                 | NA         | 1        | NA          | NA          |
| COL4A4    | viii-CUMC-all     | (Dominant) Rare Missense MTR50   | 14394           | 20             | 2021             | 0.0098               | 94             | 9469             | 0.0098               | ctrl               | 1.00       | 1        | 0.61        | 1.62        |
| COL4A5    | i-all_AURORA      | (Dominant) Rare Missense         | 1281            | 20             | 1089             | 0.018                | 111            | 9452             | 0.0116               | case               | 1.56       | 0.0817   | 0.97        | 2.53        |
| COL4A5    | i-all_AURORA      | (Dominant) Rare Missense LIMBR50 | 14901           | 0              | 1109             | 0                    | 1              | 9562             | 1.05E-04             | ctrl               | 0.00       | 1        | 0.00        | 138.07      |
| COL4A5    | i-all_AURORA      | (Dominant) Rare Missense MTR50   | 17              | 17             | 1092             | 0.0153               | 56             | 9507             | 0.0059               | case               | 2.64       | 0.0014   | 1.53        | 4.56        |
| COL4A5    | v-AURORA-CUMC-all | (Dominant) Rare Missense         | 24              | 62             | 3088             | 0.0197               | 110            | 9453             | 0.0115               | case               | 1.73       | 9.40E-04 | 1.26        | 2.36        |

|        |                   |                                  |       |     |      |        |     |      |          |      |      |          |      |       |
|--------|-------------------|----------------------------------|-------|-----|------|--------|-----|------|----------|------|------|----------|------|-------|
| COL4A5 | v-AURORA-CUMC-all | (Dominant) Rare Missense LIMBR50 | 10603 | 0   | 3150 | 0      | 1   | 9562 | 1.05E-04 | ctrl | 0.00 | 1        | 0.00 | 48.56 |
| COL4A5 | v-AURORA-CUMC-all | (Dominant) Rare Missense MTR50   | 7     | 40  | 3110 | 0.0127 | 55  | 9508 | 0.0058   | case | 2.22 | 1.90E-04 | 1.48 | 3.35  |
| COL4A5 | viii-CUMC-all     | (Dominant) Rare Missense         | 29    | 42  | 1999 | 0.0206 | 110 | 9453 | 0.0115   | case | 1.81 | 0.0018   | 1.26 | 2.58  |
| COL4A5 | viii-CUMC-all     | (Dominant) Rare Missense LIMBR50 | 15069 | 0   | 2041 | 0      | 0   | 9563 | 0        | NA   | NA   | 1        | NA   | NA    |
| COL4A5 | viii-CUMC-all     | (Dominant) Rare Missense MTR50   | 122   | 23  | 2018 | 0.0113 | 55  | 9508 | 0.0058   | case | 1.97 | 0.0102   | 1.21 | 3.21  |
| CPT2   | i-all_AURORA      | (Dominant) Rare Missense         | 8     | 18  | 1091 | 0.0162 | 56  | 9507 | 0.0059   | case | 2.80 | 7.31E-04 | 1.64 | 4.78  |
| CPT2   | i-all_AURORA      | (Dominant) Rare Missense LIMBR50 | 8     | 18  | 1091 | 0.0162 | 56  | 9507 | 0.0059   | case | 2.80 | 7.31E-04 | 1.64 | 4.78  |
| CPT2   | i-all_AURORA      | (Dominant) Rare Missense MTR50   | 1     | 15  | 1094 | 0.0135 | 19  | 9544 | 0.002    | case | 6.89 | 4.46E-07 | 3.49 | 13.59 |
| CPT2   | v-AURORA-CUMC-all | (Dominant) Rare Missense         | 11    | 39  | 3111 | 0.0124 | 56  | 9507 | 0.0059   | case | 2.13 | 4.71E-04 | 1.41 | 3.21  |
| CPT2   | v-AURORA-CUMC-all | (Dominant) Rare Missense LIMBR50 | 9     | 39  | 3111 | 0.0124 | 56  | 9507 | 0.0059   | case | 2.13 | 4.71E-04 | 1.41 | 3.21  |
| CPT2   | v-AURORA-CUMC-all | (Dominant) Rare Missense MTR50   | 1     | 28  | 3122 | 0.0089 | 19  | 9544 | 0.002    | case | 4.51 | 4.05E-07 | 2.51 | 8.08  |
| CPT2   | viii-CUMC-all     | (Dominant) Rare Missense         | 511   | 21  | 2020 | 0.0103 | 56  | 9507 | 0.0059   | case | 1.76 | 0.0341   | 1.07 | 2.92  |
| CPT2   | viii-CUMC-all     | (Dominant) Rare Missense LIMBR50 | 331   | 21  | 2020 | 0.0103 | 56  | 9507 | 0.0059   | case | 1.76 | 0.0341   | 1.07 | 2.92  |
| CPT2   | viii-CUMC-all     | (Dominant) Rare Missense MTR50   | 29    | 13  | 2028 | 0.0064 | 19  | 9544 | 0.002    | case | 3.22 | 0.0019   | 1.59 | 6.53  |
| PKD1   | i-all_AURORA      | (Dominant) Rare Missense         | 6     | 107 | 1002 | 0.0965 | 639 | 8924 | 0.0668   | case | 1.49 | 4.73E-04 | 1.20 | 1.85  |
| PKD1   | i-all_AURORA      | (Dominant) Rare Missense LIMBR50 | 1     | 100 | 1009 | 0.0902 | 575 | 8988 | 0.0601   | case | 1.55 | 1.95E-04 | 1.24 | 1.93  |
| PKD1   | i-all_AURORA      | (Dominant) Rare Missense MTR50   | 2     | 70  | 1039 | 0.0631 | 306 | 9257 | 0.032    | case | 2.04 | 1.06E-06 | 1.56 | 2.66  |
| PKD1   | v-AURORA-CUMC-all | (Dominant) Rare Missense         | 309   | 251 | 2899 | 0.0797 | 640 | 8923 | 0.0669   | case | 1.21 | 0.0158   | 1.04 | 1.41  |
| PKD1   | v-AURORA-CUMC-all | (Dominant) Rare Missense LIMBR50 | 102   | 232 | 2918 | 0.0737 | 576 | 8987 | 0.0602   | case | 1.24 | 0.009    | 1.06 | 1.45  |
| PKD1   | v-AURORA-CUMC-all | (Dominant) Rare Missense MTR50   | 14    | 143 | 3007 | 0.0454 | 304 | 9259 | 0.0318   | case | 1.45 | 4.35E-04 | 1.18 | 1.77  |
| PKD1   | viii-CUMC-all     | (Dominant) Rare Missense         | 9321  | 143 | 1898 | 0.0701 | 640 | 8923 | 0.0669   | case | 1.05 | 0.5932   | 0.87 | 1.27  |
| PKD1   | viii-CUMC-all     | (Dominant) Rare Missense LIMBR50 | 5600  | 131 | 1910 | 0.0642 | 576 | 8987 | 0.0602   | case | 1.07 | 0.5075   | 0.88 | 1.30  |
| PKD1   | viii-CUMC-all     | (Dominant) Rare Missense MTR50   | 5997  | 73  | 1968 | 0.0358 | 309 | 9254 | 0.0323   | case | 1.11 | 0.4129   | 0.86 | 1.44  |
| PKD2   | i-all_AURORA      | (Dominant) Rare Missense         | 11602 | 11  | 1098 | 0.0099 | 87  | 9476 | 0.0091   | case | 1.09 | 0.7395   | 0.58 | 2.05  |
| PKD2   | i-all_AURORA      | (Dominant) Rare Missense LIMBR50 | 2761  | 8   | 1101 | 0.0072 | 46  | 9517 | 0.0048   | case | 1.50 | 0.2643   | 0.71 | 3.19  |
| PKD2   | i-all_AURORA      | (Dominant) Rare Missense MTR50   | 11528 | 5   | 1104 | 0.0045 | 40  | 9523 | 0.0042   | case | 1.08 | 0.8064   | 0.42 | 2.74  |
| PKD2   | v-AURORA-CUMC-all | (Dominant) Rare Missense         | 12282 | 27  | 3123 | 0.0086 | 90  | 9473 | 0.0094   | ctrl | 0.91 | 0.7472   | 0.59 | 1.40  |

|       |                   |                                  |       |    |      |          |    |      |        |      |      |        |      |      |
|-------|-------------------|----------------------------------|-------|----|------|----------|----|------|--------|------|------|--------|------|------|
| PKD2  | v-AURORA-CUMC-all | (Dominant) Rare Missense LIMBR50 | 10726 | 16 | 3134 | 0.0051   | 49 | 9514 | 0.0051 | ctrl | 0.99 | 1      | 0.56 | 1.75 |
| PKD2  | v-AURORA-CUMC-all | (Dominant) Rare Missense MTR50   | 13654 | 15 | 3135 | 0.0048   | 43 | 9520 | 0.0045 | case | 1.06 | 0.8789 | 0.59 | 1.91 |
| PKD2  | viii-CUMC-all     | (Dominant) Rare Missense         | 8129  | 15 | 2026 | 0.0073   | 88 | 9475 | 0.0092 | ctrl | 0.80 | 0.5153 | 0.46 | 1.38 |
| PKD2  | viii-CUMC-all     | (Dominant) Rare Missense LIMBR50 | 5193  | 7  | 2034 | 0.0034   | 47 | 9516 | 0.0049 | ctrl | 0.70 | 0.474  | 0.31 | 1.54 |
| PKD2  | viii-CUMC-all     | (Dominant) Rare Missense MTR50   | 12900 | 9  | 2032 | 0.0044   | 41 | 9522 | 0.0043 | case | 1.03 | 0.8541 | 0.50 | 2.12 |
| SCLT1 | i-all_AURORA      | (Dominant) Rare Missense         | 7434  | 3  | 1106 | 0.0027   | 47 | 9516 | 0.0049 | ctrl | 0.55 | 0.4821 | 0.17 | 1.77 |
| SCLT1 | i-all_AURORA      | (Dominant) Rare Missense LIMBR50 | 14950 | 0  | 1109 | 0        | 0  | 9563 | 0      | NA   | NA   | 1      | NA   | NA   |
| SCLT1 | i-all_AURORA      | (Dominant) Rare Missense MTR50   | 4700  | 1  | 1108 | 9.02E-04 | 26 | 9537 | 0.0027 | ctrl | 0.33 | 0.3555 | 0.04 | 2.44 |
| SCLT1 | v-AURORA-CUMC-all | (Dominant) Rare Missense         | 5048  | 20 | 3130 | 0.0063   | 46 | 9517 | 0.0048 | case | 1.32 | 0.3168 | 0.78 | 2.24 |
| SCLT1 | v-AURORA-CUMC-all | (Dominant) Rare Missense LIMBR50 | 15216 | 0  | 3150 | 0        | 0  | 9563 | 0      | NA   | NA   | 1      | NA   | NA   |
| SCLT1 | v-AURORA-CUMC-all | (Dominant) Rare Missense MTR50   | 15251 | 8  | 3142 | 0.0025   | 26 | 9537 | 0.0027 | ctrl | 0.93 | 1      | 0.42 | 2.06 |
| SCLT1 | viii-CUMC-all     | (Dominant) Rare Missense         | 1008  | 17 | 2024 | 0.0083   | 46 | 9517 | 0.0048 | case | 1.74 | 0.0657 | 0.99 | 3.04 |
| SCLT1 | viii-CUMC-all     | (Dominant) Rare Missense LIMBR50 | 15113 | 0  | 2041 | 0        | 0  | 9563 | 0      | NA   | NA   | 1      | NA   | NA   |
| SCLT1 | viii-CUMC-all     | (Dominant) Rare Missense MTR50   | 9699  | 7  | 2034 | 0.0034   | 26 | 9537 | 0.0027 | case | 1.26 | 0.6453 | 0.55 | 2.91 |

**Table S5: All collapsing analysis results for all genes across all models, where  $P < 0.05$ . This table is available as a separate file (SUPP\_TABLE\_S5\_Final.xlsx)**

### **Column descriptors for Table S5**

*Rank.Within.Model* – Gene rank (by P value) with the corresponding subgroup analysis

*model.name* – subgroup collapsing model (Table S3)

*Gene.Name* – gene name (HGNC symbol)

*Enriched.Direction* – whether enrichment of qualified variants are in cases or controls

*Fet.P* – P-value (Fisher's Exact Test)

*OR* – odds ratio (Fisher's Exact Test)

*known.ckd.gene* – whether a human renal phenotype with Mendelian inheritance has been previously reported for mutations in this gene (1 = yes, 0 = no)

*Qualified.Case* – number of cases carrying a qualifying variant

*Unqualified.Case* – number of cases not carrying a qualifying variant

*Qualified.Case.Freq* – frequency of cases carrying a qualifying variant

*Qualified.Ctrl* – number of controls carrying a qualifying variant

*Unqualified.Ctrl* – number of controls not carrying a qualifying variant

*Qualified.Ctrl.Freq* – frequency of controls carrying a qualifying variant

*RVIS.ExAC* – Exac-based Residual Variation Intolerance Score [13] for the gene. Lower scores indicate the gene is more intolerant to non-synonymous variation.

*GenicConstraint\_mis.z.ExAC* – ExAC-based Constraint (missense z) scores [14] for the gene. Lower scores indicate greater constraint on non-synonymous mutations.

*LoF.FDR.ExAC* – An exome-wide FDR adjusted loss-of-function depletion p-value [15] generated to find genes that are specifically depleted of LoF genetic variation using the ExAC reference cohort.

*LoF.pLI.ExAC* – ExAC-based probability of being loss-of-function intolerant (intolerant of both heterozygous and homozygous LoF variants).

*LoF.pRec.ExAC* – ExAC-based probability of being intolerant of homozygous, but not heterozygous LoF variants.

*LoF.pNull.ExAC* – ExAC-based probability of being tolerant of both heterozygous and homozygous LoF variants.

**Supplemental table S6. Distribution of phenotypes in cases with qualifying variants in *PKD1*, *PKD2*, *COL4A3*, *COL4A4* and *COL4A5***

| Collapsing Analysis Results |             | Clinical Diagnosis     |                      |            |                       |                    |              |                        |                                          |                               |                        |
|-----------------------------|-------------|------------------------|----------------------|------------|-----------------------|--------------------|--------------|------------------------|------------------------------------------|-------------------------------|------------------------|
| Gene                        | group       | model                  | Fisher exact P-value | Odds ratio | Total qualified cases | Diabetes Count (%) | GN Count (%) | Hypertension Count (%) | Mendelian / Congenital Anomaly Count (%) | Tubulo-interstitial Count (%) | Unknown/other Count(%) |
| <i>PKD1</i>                 | All samples | dom_ultrarare_OO       | 1.66E-22             | 6          | 83                    | 3 (3.61%)          | 9 (10.8%)    | 2 (2.4%)               | 64 (77.1%)                               | 1 (1.2%)                      | 4 (4.8%)               |
| <i>PKD2</i>                 | All samples | dom_rare_LOF           | 7.27E-13             | 61         | 20                    | 0                  | 0            | 0                      | 20 (100%)                                | 0                             | 0                      |
| <i>COL4A5</i>               | All samples | dom_rare_mtr50         | 4.80E-07             | 2.8        | 49                    | 4 (8.2%)           | 13 (26.5%)   | 5 (10.2%)              | 18 (36.7%)                               | 3 (6.1%)                      | 6 (12.7%)              |
| <i>COL4A4</i>               | All samples | dom_ultrarare_LIMBR50* | 1.01E-05             | 8.5        | 14                    | 0                  | 4 (28.6%)    | 3 (21.4%)              | 5 (35.7%)                                | 2 (15.3%)                     | 0                      |
| <i>COL4A3</i>               | All samples | dom_ultrarare_OO       | 3.05E-05             | 7.9        | 13                    | 0                  | 6 (46.1%)    | 1 (7.7%)               | 3 (23.1%)                                | 2 (15.4%)                     | 1 (7.7%)               |

\*All missense variants were excluded in this gene under the LIMBR50 filter, and all qualifying variants (case and control) are predicted Loss of Function

**Table S7. Ancestry of samples in the modifier analysis, using PCA of genotypes.**

| Population     | PKD1/2 |         | COL4A3/4/5 |         | APOL1 high risk |         |
|----------------|--------|---------|------------|---------|-----------------|---------|
|                | Count  | Percent | Count      | Percent | Count           | Percent |
| African        | 3      | 3.19%   | 11         | 12.60%  | 109             | 79.60%  |
| Caucasian      | 84     | 89.40%  | 51         | 58.60%  | 0               | 0.00%   |
| East Asian     | 0      | 0.00%   | 2          | 2.30%   | 0               | 0.00%   |
| Hispanic*      | 1      | 1.06%   | 11         | 12.60%  | 27              | 19.70%  |
| Middle Eastern | 1      | 1.06%   | 1          | 1.15%   | 0               | 0.00%   |
| South Asian    | 0      | 0.00%   | 0          | 0.00%   | 0               | 0.00%   |
| Unknown^       | 5      | 5.32%   | 11         | 12.60%  | 1               | 0.73%   |

\*Note that those who self-identified as 'Hispanic' ethnicity in the comparison group were predominantly of Afro-Caribbean descent.

^ 'Unknown' was defined as a multinomial prediction  $p < 0.95$  for all listed ancestry groups.



**Table S8:** AHDC1 rare QV rates in cases with APOL1 genotypes (dual risk, heterozygous, and homozygous reference) against ancestry-matched controls

|                                                    | Qualified Case | Unqualified Case | Qualified Ctrl | Unqualified Ctrl | Odds Ratio | P        | CI 95 lower | CI 95 higher |
|----------------------------------------------------|----------------|------------------|----------------|------------------|------------|----------|-------------|--------------|
| AHDC1 in dual risk APOL1 (hom or comp het G1 / G2) | 9              | 128              | 11             | 2198             | 14         | 5.91E-07 | 5.03        | 37.91        |
| AHDC1 in Het G1 or G2                              | 2              | 172              | 11             | 2198             | 2.322      | 0.24     | 0.25        | 10.77        |
| AHDC1 in Hom Ref G1 and G2                         | 4              | 427              | 11             | 2198             | 1.871      | 0.29     | 0.43        | 6.35         |

**Table S9: Association results of top genes from the collapsing analysis with CKD phenotypes in the UK biobank (GeneAtlas database)**

|                                 | <i>Gene</i>                                                                                        | <i>AHDC1</i>       | <i>CPT2</i>        | <i>COL4A3</i>      | <i>COL4A4</i>     | <i>PKD2</i>      | <i>SCLT1</i>       | <i>SLC17A1</i>     | <i>PKD1</i>        | <i>COL4A5</i>    |          |
|---------------------------------|----------------------------------------------------------------------------------------------------|--------------------|--------------------|--------------------|-------------------|------------------|--------------------|--------------------|--------------------|------------------|----------|
|                                 | Chr                                                                                                | 1                  | 1                  | 2                  | 2                 | 4                | 4                  | 6                  | 16                 | X                |          |
|                                 | Gene Start                                                                                         | 27873815           | 53662616           | 228029443          | 227872041         | 88928886         | 129805632          | 25799013           | 2139728            | 107683356        |          |
|                                 | Gene Stop                                                                                          | 27878626           | 53679267           | 228176586          | 228012199         | 88996846         | 130014258          | 25830785           | 2185690            | 107939608        |          |
|                                 | <u>Lowest P</u>                                                                                    | <u>6.49E-05</u>    | <u>9.35E-05</u>    | <u>1.97E-05</u>    | <u>2.51E-17</u>   | <u>7.54E-05</u>  | <u>7.71E-06</u>    | <u>1.87E-05</u>    | <u>4.16E-06</u>    | <u>1.96E-05</u>  |          |
|                                 | <u>Lowest P SNP</u>                                                                                | <u>rs147012676</u> | <u>rs144844459</u> | <u>rs188942711</u> | <u>rs35138315</u> | <u>rs1481012</u> | <u>rs190446297</u> | <u>rs183313411</u> | <u>rs200930978</u> | <u>rs1028404</u> |          |
| <b>Trait Key</b>                | <b>Trait Description</b>                                                                           |                    |                    |                    |                   |                  |                    |                    |                    |                  |          |
| <b>clinical_c_Block_N00-N08</b> | N00-N08 Glomerular diseases                                                                        | n.nom.snps         | 0                  | 0                  | 0                 | 1                | 0                  | 0                  | 0                  | 1                | 0        |
|                                 |                                                                                                    | lowest.p           | NA                 | NA                 | NA                | 2.08E-09         | NA                 | NA                 | NA                 | 4.16E-06         | NA       |
| <b>clinical_c_Block_N10-N16</b> | N10-N16 Renal tubulo-interstitial diseases                                                         | n.nom.snps         | 0                  | 0                  | 0                 | 0                | 0                  | 4                  | 0                  | 0                | 0        |
|                                 |                                                                                                    | lowest.p           | NA                 | NA                 | NA                | NA               | NA                 | 7.71E-06           | NA                 | NA               | NA       |
| <b>clinical_c_Block_N20-N23</b> | N20-N23 Urolithiasis                                                                               | n.nom.snps         | 0                  | 0                  | 0                 | 0                | 6                  | 0                  | 0                  | 3                | 2        |
|                                 |                                                                                                    | lowest.p           | NA                 | NA                 | NA                | NA               | 8.36E-06           | NA                 | NA                 | 5.24E-05         | 8.18E-05 |
| <b>clinical_c_Block_O10-O16</b> | O10-O16 Oedema, proteinuria and hypertensive disorders in pregnancy, childbirth and the puerperium | n.nom.snps         | 0                  | 0                  | 0                 | 0                | 0                  | 0                  | 0                  | 1                | 0        |
|                                 |                                                                                                    | lowest.p           | NA                 | NA                 | NA                | NA               | NA                 | NA                 | NA                 | 6.91E-05         | NA       |
| <b>clinical_c_N03</b>           | N03 Chronic nephritic syndrome                                                                     | n.nom.snps         | 0                  | 1                  | 0                 | 1                | 0                  | 0                  | 0                  | 0                | 0        |
|                                 |                                                                                                    | lowest.p           | NA                 | 9.35E-05           | NA                | 1.66E-05         | NA                 | NA                 | NA                 | NA               | NA       |
| <b>clinical_c_N18</b>           | N18 Chronic renal failure                                                                          | n.nom.snps         | 0                  | 0                  | 0                 | 1                | 0                  | 0                  | 0                  | 0                | 0        |
|                                 |                                                                                                    | lowest.p           | NA                 | NA                 | NA                | 6.23E-08         | NA                 | NA                 | NA                 | NA               | NA       |
| <b>clinical_c_N19</b>           | N19 Unspecified renal failure                                                                      | n.nom.snps         | 1                  | 0                  | 1                 | 0                | 0                  | 0                  | 0                  | 0                | 0        |
|                                 |                                                                                                    | lowest.p           | 6.49E-05           | NA                 | 1.97E-05          | NA               | NA                 | NA                 | NA                 | NA               | NA       |
| <b>clinical_c_N20</b>           | N20 Calculus of kidney and ureter                                                                  | n.nom.snps         | 0                  | 0                  | 0                 | 0                | 1                  | 0                  | 20                 | 0                | 8        |
|                                 |                                                                                                    | lowest.p           | NA                 | NA                 | NA                | NA               | 7.54E-05           | NA                 | 4.30E-05           | NA               | 1.96E-05 |
| <b>clinical_c_N23</b>           | N23 Unspecified renal colic                                                                        | n.nom.snps         | 0                  | 0                  | 1                 | 0                | 0                  | 0                  | 0                  | 0                | 0        |
|                                 |                                                                                                    | lowest.p           | NA                 | NA                 | 9.00E-05          | NA               | NA                 | NA                 | NA                 | NA               | NA       |
| <b>selfReported_n_1213</b>      | renal/kidney failure                                                                               | n.nom.snps         | 0                  | 0                  | 0                 | 0                | 0                  | 0                  | 2                  | 0                | 0        |
|                                 |                                                                                                    | lowest.p           | NA                 | NA                 | NA                | NA               | NA                 | NA                 | 1.87E-05           | NA               | NA       |
| <b>selfReported_n_1218</b>      | kidney stone/ureter stone/bladder stone                                                            | n.nom.snps         | 0                  | 0                  | 0                 | 0                | 0                  | 0                  | 12                 | 0                | 0        |
|                                 |                                                                                                    | lowest.p           | NA                 | NA                 | NA                | NA               | NA                 | NA                 | 4.16E-05           | NA               | NA       |
| <b>selfReported_n_1454</b>      | other renal/kidney problem                                                                         | n.nom.snps         | 0                  | 0                  | 0                 | 1                | 0                  | 1                  | 0                  | 0                | 0        |
|                                 |                                                                                                    | lowest.p           | NA                 | NA                 | NA                | 2.51E-17         | NA                 | 7.72E-06           | NA                 | NA               | NA       |

SNPs within 50Kb upstream/downstream of each gene were interrogated in GeneAtlas data (<http://geneatlas.roslin.ed.ac.uk/>, last accessed 2018-12-01). The lowest p-value for each trait are indicated, and the lowest SNP overall for each gene across all traits. Traits with p-values >1x 10<sup>-4</sup> are indicated as NA.

**Table S10:** Predicting possible p-value signals among an increasing sized test cohort.

| Gene     | Case Frequency (n=3150) | Control Frequency (n=9563) | Fisher's Exact (FET) P-value | FET 2-fold | FET (3-fold case) (2-fold control) | FET 3-fold | Case L95% | Case U95% | Control L95% | Control U95% |
|----------|-------------------------|----------------------------|------------------------------|------------|------------------------------------|------------|-----------|-----------|--------------|--------------|
| PKD1     | 0.0263                  | 0.0045                     | 1.66E-22                     | 2.17E-43   | 2.33E-54                           | 3.27E-64   | 0.02104   | 0.03256   | 0.003256     | 0.006052     |
| PKD2     | 0.0038                  | 0.0001                     | 5.29E-07                     | 5.25E-13   | 1.55E-15                           | 5.85E-19   | 0.00197   | 0.006645  | 2.65E-06     | 5.82E-04     |
| COL4A3   | 0.0041                  | 0.0005                     | 3.05E-05                     | 2.86E-09   | 2.93E-11                           | 3.07E-13   | 0.002199  | 0.007047  | 0.00017      | 0.00122      |
| TUBA1C   | 0.0022                  | 0                          | 5.71E-05                     | 3.25E-09   | 7.97E-11                           | 1.85E-13   | 0.000894  | 0.004573  | 0            | 0.000386     |
| COL4A4   | 0.0051                  | 0.001                      | 7.52E-05                     | 2.07E-08   | 3.18E-10                           | 6.51E-12   | 0.002906  | 0.008235  | 0.000502     | 0.001922     |
| CDH24    | 0.0032                  | 0.0003                     | 1.15E-04                     | 3.43E-08   | 7.21E-10                           | 1.16E-11   | 0.001523  | 0.00583   | 6.47E-05     | 9.17E-04     |
| EDEM2    | 0.0032                  | 0.0003                     | 1.15E-04                     | 3.43E-08   | 7.21E-10                           | 1.16E-11   | 0.001523  | 0.00583   | 6.47E-05     | 9.17E-04     |
| ANXA2    | 0.0029                  | 0.0002                     | 1.16E-04                     | 3.07E-08   | 7.03E-10                           | 9.18E-12   | 0.001307  | 0.005417  | 2.53E-05     | 7.55E-04     |
| COL4A5   | 0.0048                  | 0.0012                     | 3.46E-04                     | 4.30E-07   | 1.29E-08                           | 8.30E-10   | 0.002668  | 0.007842  | 0.000574     | 0.002057     |
| NTNG1    | 0.0022                  | 0.0001                     | 3.58E-04                     | 2.31E-07   | 9.46E-09                           | 1.67E-10   | 0.000894  | 0.004573  | 2.65E-06     | 5.82E-04     |
| SIPA1    | 0.0022                  | 0.0001                     | 3.58E-04                     | 2.31E-07   | 9.46E-09                           | 1.67E-10   | 0.000894  | 0.004573  | 2.65E-06     | 5.82E-04     |
| HSPA1L   | 0.0032                  | 0.0005                     | 7.31E-04                     | 1.54E-06   | 6.78E-08                           | 3.70E-09   | 0.001523  | 0.00583   | 0.00017      | 0.00122      |
| SDR42E1  | 0.0016                  | 0                          | 9.32E-04                     | 8.68E-07   | 6.14E-08                           | 8.08E-10   | 0.000516  | 0.0037    | 0            | 0.000386     |
| MB21D2   | 0.0016                  | 0                          | 9.32E-04                     | 8.68E-07   | 6.14E-08                           | 8.08E-10   | 0.000516  | 0.0037    | 0            | 0.000386     |
| IMMT     | 0.0016                  | 0                          | 9.32E-04                     | 8.68E-07   | 6.14E-08                           | 8.08E-10   | 0.000516  | 0.0037    | 0            | 0.000386     |
| ZNF439   | 0.0025                  | 0.0003                     | 0.0011                       | 3.04E-06   | 1.74E-07                           | 9.49E-09   | 0.001097  | 0.004998  | 6.47E-05     | 9.17E-04     |
| AR       | 0.0041                  | 0.001                      | 0.0011                       | 6.29E-06   | 2.33E-07                           | 2.13E-08   | 0.002199  | 0.007047  | 0.000502     | 0.001922     |
| FAM189A1 | 0.0035                  | 0.0007                     | 0.0011                       | 4.02E-06   | 3.61E-07                           | 1.62E-08   | 0.001744  | 0.00624   | 0.000294     | 0.001508     |
| NOX3     | 0.0035                  | 0.0007                     | 0.0011                       | 4.02E-06   | 3.61E-07                           | 1.62E-08   | 0.001744  | 0.00624   | 0.000294     | 0.001508     |
| VPS33B   | 0.0022                  | 0.0002                     | 0.0013                       | 3.49E-06   | 2.22E-07                           | 1.09E-08   | 0.000894  | 0.004573  | 2.53E-05     | 7.55E-04     |
| SLC12A6  | 0.0022                  | 0.0002                     | 0.0013                       | 3.49E-06   | 2.22E-07                           | 1.09E-08   | 0.000894  | 0.004573  | 2.53E-05     | 7.55E-04     |
| SMYD1    | 0.0022                  | 0.0002                     | 0.0013                       | 3.49E-06   | 2.22E-07                           | 1.09E-08   | 0.000894  | 0.004573  | 2.53E-05     | 7.55E-04     |
| CDNF     | 0.0019                  | 0.0001                     | 0.0013                       | 2.88E-06   | 1.99E-07                           | 7.31E-09   | 0.000699  | 0.004141  | 2.65E-06     | 5.82E-04     |
| NOS2     | 0.0029                  | 0.0005                     | 0.002                        | 1.12E-05   | 1.14E-06                           | 7.14E-08   | 0.001307  | 0.005417  | 0.00017      | 0.00122      |
| CDH2     | 0.0029                  | 0.0005                     | 0.002                        | 1.12E-05   | 1.14E-06                           | 7.14E-08   | 0.001307  | 0.005417  | 0.00017      | 0.00122      |
| GPR128   | 0.0025                  | 0.0004                     | 0.0026                       | 1.77E-05   | 1.44E-06                           | 1.37E-07   | 0.001097  | 0.004998  | 0.000114     | 0.001071     |
| MRC2     | 0.0025                  | 0.0004                     | 0.0026                       | 1.77E-05   | 1.44E-06                           | 1.37E-07   | 0.001097  | 0.004998  | 0.000114     | 0.001071     |
| SPN      | 0.0025                  | 0.0004                     | 0.0026                       | 1.77E-05   | 1.44E-06                           | 1.37E-07   | 0.001097  | 0.004998  | 0.000114     | 0.001071     |
| ACAD11   | 0.0025                  | 0.0004                     | 0.0026                       | 1.77E-05   | 1.44E-06                           | 1.37E-07   | 0.001097  | 0.004998  | 0.000114     | 0.001071     |
| CCDC147  | 0.0025                  | 0.0004                     | 0.0026                       | 1.77E-05   | 1.44E-06                           | 1.37E-07   | 0.001097  | 0.004998  | 0.000114     | 0.001071     |

Reflecting on the top 30 genes in the all-cause CKD ultra-rare deleterious model we provide examples of possible enrichment p-value signals as the cohort size scales up (two- and/or three-fold) under the strict assumption that the current case and control carrier frequency estimates remain true and that the case composition remains the same during the up-scale. Orange shaded cells indicate genes that surpass experiment-wide significance threshold of  $p < 2.7 \times 10^{-8}$ .

**FET** = Fisher's Exact test.

**FET 2-fold** = A Fisher's Exact Test p-value assuming the currently observed case and control frequencies remain the same among double the cases (n=6,300) and double the controls (n=19,126).

**FET (3-fold case) (2-fold control)** = A Fisher's Exact Test p-value assuming the currently observed case and control frequencies remain the same among triple the cases (n=9,450) and double the controls (n=19,126).

**FET 3-fold** = A Fisher's Exact Test p-value assuming the currently observed case and control frequencies remain the same among triple the cases (n=9,450) and triple the controls (n=28,689).

**Case L95%/U95%** = The 95%CI sampling variability range for the current observed case carrier frequency estimate.

**Control L95%/U95%** = The 95%CI sampling variability range for the current observed control carrier frequency estimate.

## References:

1. Manichaikul A, Mychaleckyj JC, Rich SS, Daly K, Sale M, Chen W-M. Robust relationship inference in genome-wide association studies. *Bioinformatics*. 2010;26(22):2867-73.
2. Price AL, Patterson NJ, Plenge RM, Weinblatt ME, Shadick NA, Reich D. Principal components analysis corrects for stratification in genome-wide association studies. *Nature genetics*. 2006;38(8):904-9.
3. Lek M, Karczewski KJ, Minikel EV, Samocha KE, Banks E, Fennell T, et al. Analysis of protein-coding genetic variation in 60,706 humans. *Nature*. 2016;536(7616):285-91. doi: 10.1038/nature19057. PubMed PMID: 27535533; PubMed Central PMCID: PMC5018207.
4. Petrovski S, Todd JL, Durham MT, Wang Q, Chien JW, Kelly FL, et al. An Exome Sequencing Study to Assess the Role of Rare Genetic Variation in Pulmonary Fibrosis. *American journal of respiratory and critical care medicine*. 2017;(ja).
5. Gussow AB, Petrovski S, Wang Q, Allen AS, Goldstein DB. The intolerance to functional genetic variation of protein domains predicts the localization of pathogenic mutations within genes. *Genome Biol*. 2016;17:9. doi: 10.1186/s13059-016-0869-4. PubMed PMID: 26781712; PubMed Central PMCID: PMC4717634.
6. Marchler-Bauer A, Bo Y, Han L, He J, Lanczycki CJ, Lu S, et al. CDD/SPARCLE: functional classification of proteins via subfamily domain architectures. *Nucleic Acids Research*. 2017;45(Database issue):D200-D3. doi: 10.1093/nar/gkw1129. PubMed PMID: PMC5210587.
7. Hayeck TJ, Stong N, Wolock CJ, Copeland B, Kamalakaran S, Goldstein DB, et al. Improved Pathogenic Variant Localization via a Hierarchical Model of Sub-regional Intolerance. *Am J Hum Genet*. 2019;104(2):299-309. Epub 2019/01/29. doi: 10.1016/j.ajhg.2018.12.020. PubMed PMID: 30686509; PubMed Central PMCID: PMC6369453.
8. Adzhubei IA, Schmidt S, Peshkin L, Ramensky VE, Gerasimova A, Bork P, et al. A method and server for predicting damaging missense mutations. *Nature methods*. 2010;7(4):248-9.
9. Gelfman SD, S., Araujo Martins Moreno C, Ren Z, Wolock C, Shneider N, Phatnani H, et al. Regional collapsing of rare variation implicates specific regions in known and novel ALS genes. In Prep. 2018.
10. Petrovski S, Goldstein DB. Unequal representation of genetic variation across ancestry groups creates healthcare inequality in the application of precision medicine. *Genome Biol*. 2016;17(1):157. doi: 10.1186/s13059-016-1016-y. PubMed PMID: 27418169; PubMed Central PMCID: PMC4944427.

11. Petrovski S, Todd JL, Durheim MT, Wang Q, Chien JW, Kelly FL, et al. An Exome Sequencing Study to Assess the Role of Rare Genetic Variation in Pulmonary Fibrosis. *Am J Respir Crit Care Med*. 2017;196(1):82-93. doi: 10.1164/rccm.201610-2088OC. PubMed PMID: 28099038; PubMed Central PMCID: PMC5519963.
12. Epi4K consortium. Ultra-rare genetic variation in common epilepsies: a case-control sequencing study. *The Lancet Neurology*. 2017;16(2):135-43. Epub 2017/01/20. doi: 10.1016/s1474-4422(16)30359-3. PubMed PMID: 28102150.
13. Petrovski S, Wang Q, Heinzen EL, Allen AS, Goldstein DB. Genic Intolerance to Functional Variation and the Interpretation of Personal Genomes. *PLOS Genetics*. 2013;9(8):e1003709. doi: 10.1371/journal.pgen.1003709.
14. Samocha KE, Robinson EB, Sanders SJ, Stevens C, Sabo A, McGrath LM, et al. A framework for the interpretation of de novo mutation in human disease. *Nature Genetics*. 2014;46:944. doi: 10.1038/ng.3050  
<https://www.nature.com/articles/ng.3050#supplementary-information>.
15. Petrovski S, Gussow AB, Wang Q, Halvorsen M, Han Y, Weir WH, et al. The Intolerance of Regulatory Sequence to Genetic Variation Predicts Gene Dosage Sensitivity. *PLoS genetics*. 2015;11(9):e1005492. doi: 10.1371/journal.pgen.1005492. PubMed PMID: 26332131; PubMed Central PMCID: PMC4557908.
